# Supplementary material for: Prognostic Impact of Pelvic Lymph Node Dissection During Radical Prostatectomy on Patients With High-risk Prostate Cancer Treated With Neoadjuvant Chemohormonal Therapy
Source: Research Square preprint supplement (doi:10.21203/rs.3.rs-1161305/v1), 2021-12-22
Supplement: Supplementary file 1 [file 51046bc7e72b1b4cff19111a.docx]

Table S1. Surgical outcomes and complications between the limited and the non-PLND groups (excluded RRP cases)

|  | Limited-PLND group  (n = 152) | Non-PLND group  (n = 227) | *P-value* |
| --- | --- | --- | --- |
| Median operation time, min (IQR) | 176 (155–205) | 162 (141–191) | *0.001* |
| Median blood loss, mL (IQR) | 30 (7–50) | 25 (10–50) | *0.593* |
| Surgical complications (Clavien-Dindo classification) |  |  |  |
| All grades, n (%) | 29 (19) | 15 (7) | *<0.001* |
| Grade ≥ 3, n (%) | 5 (3) | 0 (0) | *0.010* |

Table S2. Number of dissected nodes stratified by patients’ background, surgery type, and preoperative disease status

|  | Number of dissected nodes | | *P-value* |
| --- | --- | --- | --- |
|  | Median (IQR) | Average (min to max) |
| Age at surgery |  |  | *0.876* |
| > 68 | 4 (3–7) | 5 (0–12) |  |
| ≤ 68 | 4 (3–7) | 5 (0–18) |  |
| Anticoagulant use |  |  | *0.279* |
| Yes | 4 (3–5) | 4 (0–12) |  |
| No | 4 (3–7) | 5 (0–17) |  |
| Surgery type |  |  | *0.770* |
| RARP | 4 (3–7) | 5 (1–16) |  |
| RRP | 4 (2–7) | 5 (0–18) |  |
| Clinical tumor stage |  |  | *0.963* |
| > cT2 | 4 (3–7) | 5 (1–16) |  |
| ≤ cT2 | 4 (3–7) | 5 (0–18) |  |
| Biopsy Gleason score |  |  | *0.744* |
| ISUP GG > 3 | 4 (3–7) | 5 (0–18) |  |
| ISUP GG ≤ 3 | 4 (3–7) | 5 (0–16) |  |
